# Supplementary material
Source: PubMed Central journal article supplement (PMC1720537)
Supplement: archdisch_90_8_816__1.pdf [file archdisch_90_8_816__1.pdf]

**Table. Geographical distribution of editorial board members for each journal (Online supplement)**

| <b>Journal</b>                                          | <b>Current country of affiliation of board members</b> |     |                                                                                                                                                                                                                                             |
|---------------------------------------------------------|--------------------------------------------------------|-----|---------------------------------------------------------------------------------------------------------------------------------------------------------------------------------------------------------------------------------------------|
| <i>Acta Paediatrica</i>                                 | <i>Total</i>                                           | 27  |                                                                                                                                                                                                                                             |
|                                                         | <i>High HDI</i>                                        | 26  | Sweden 5, USA 3, Canada 2, Denmark 2, Germany 2, Italy 2, Norway 2, UK 2, Austria 1, Finland 1, France 1, Israel 1, New Zealand 1, The Netherlands 1                                                                                        |
|                                                         | <i>Medium HDI</i>                                      | 1   | China 1                                                                                                                                                                                                                                     |
|                                                         | <i>Low HDI</i>                                         | 0   | -                                                                                                                                                                                                                                           |
| <i>Archives of Disease in Childhood</i>                 | <i>Total</i>                                           | 12  |                                                                                                                                                                                                                                             |
|                                                         | <i>High HDI</i>                                        | 12  | UK 10, USA 2                                                                                                                                                                                                                                |
|                                                         | <i>Medium HDI</i>                                      | 0   | -                                                                                                                                                                                                                                           |
|                                                         | <i>Low HDI</i>                                         | 0   | -                                                                                                                                                                                                                                           |
| <i>Archives of Pediatrics &amp; Adolescent Medicine</i> | <i>Total</i>                                           | 15  |                                                                                                                                                                                                                                             |
|                                                         | <i>High HDI</i>                                        | 15  | USA 14, Canada 1                                                                                                                                                                                                                            |
|                                                         | <i>Medium HDI</i>                                      | 0   | -                                                                                                                                                                                                                                           |
|                                                         | <i>Low HDI</i>                                         | 0   | -                                                                                                                                                                                                                                           |
| <i>Clinical Pediatrics</i>                              | <i>Total</i>                                           | 19  |                                                                                                                                                                                                                                             |
|                                                         | <i>High HDI</i>                                        | 19  | USA 19                                                                                                                                                                                                                                      |
|                                                         | <i>Medium HDI</i>                                      | 0   | -                                                                                                                                                                                                                                           |
|                                                         | <i>Low HDI</i>                                         | 0   | -                                                                                                                                                                                                                                           |
| <i>European Journal of Pediatrics</i>                   | <i>Total</i>                                           | 8   |                                                                                                                                                                                                                                             |
|                                                         | <i>High HDI</i>                                        | 8   | Germany 4, Switzerland 2, The Netherlands 1, UK 1                                                                                                                                                                                           |
|                                                         | <i>Medium HDI</i>                                      | 0   | -                                                                                                                                                                                                                                           |
|                                                         | <i>Low HDI</i>                                         | 0   | -                                                                                                                                                                                                                                           |
| <i>Journal of Adolescent Health</i>                     | <i>Total</i>                                           | 27  |                                                                                                                                                                                                                                             |
|                                                         | <i>High HDI</i>                                        | 27  | USA 24, Australia 1, Canada 1, Switzerland 1                                                                                                                                                                                                |
|                                                         | <i>Medium HDI</i>                                      | 0   | -                                                                                                                                                                                                                                           |
|                                                         | <i>Low HDI</i>                                         | 0   | -                                                                                                                                                                                                                                           |
| <i>Journal of Paediatrics and Child Health</i>          | <i>Total</i>                                           | 10  |                                                                                                                                                                                                                                             |
|                                                         | <i>High HDI</i>                                        | 10  | Australia 3, USA 2, Canada 1, Hong Kong 1, Japan 1, New Zealand 1, Singapore 1                                                                                                                                                              |
|                                                         | <i>Medium HDI</i>                                      | 0   | -                                                                                                                                                                                                                                           |
|                                                         | <i>Low HDI</i>                                         | 0   | -                                                                                                                                                                                                                                           |
| <i>Journal of Pediatrics</i>                            | <i>Total</i>                                           | 23  |                                                                                                                                                                                                                                             |
|                                                         | <i>High HDI</i>                                        | 22  | USA 19, Chile 1, Sweden 1, UK 1                                                                                                                                                                                                             |
|                                                         | <i>Medium HDI</i>                                      | 1   | Thailand 1                                                                                                                                                                                                                                  |
|                                                         | <i>Low HDI</i>                                         | 0   | -                                                                                                                                                                                                                                           |
| <i>Pediatric Research</i>                               | <i>Total</i>                                           | 18  |                                                                                                                                                                                                                                             |
|                                                         | <i>High HDI</i>                                        | 18  | France 10, USA 8                                                                                                                                                                                                                            |
|                                                         | <i>Medium HDI</i>                                      | 0   | -                                                                                                                                                                                                                                           |
|                                                         | <i>Low HDI</i>                                         | 0   | -                                                                                                                                                                                                                                           |
| <i>Pediatrics</i>                                       | <i>Total</i>                                           | 23  |                                                                                                                                                                                                                                             |
|                                                         | <i>High HDI</i>                                        | 23  | USA 22, Canada 1                                                                                                                                                                                                                            |
|                                                         | <i>Medium HDI</i>                                      | 0   | -                                                                                                                                                                                                                                           |
|                                                         | <i>Low HDI</i>                                         | 0   | -                                                                                                                                                                                                                                           |
| <i>Pediatrics International</i>                         | <i>Total</i>                                           | 25  | Taiwan is not classified in the Human Development Report 2004                                                                                                                                                                               |
|                                                         | <i>High HDI</i>                                        | 18  | Japan 10, USA 3, Sweden 2, Australia 1, Kuwait 1, UK 1                                                                                                                                                                                      |
|                                                         | <i>Medium HDI</i>                                      | 6   | Russia 2, China 1, Philippines 1, Thailand 1, Turkey 1                                                                                                                                                                                      |
|                                                         | <i>Low HDI</i>                                         | 0   | -                                                                                                                                                                                                                                           |
| <i>All eleven journals together</i>                     | <i>Total</i>                                           | 207 |                                                                                                                                                                                                                                             |
|                                                         | <i>High HDI</i>                                        | 198 | USA 116, UK 15, France 11, Japan 11, Sweden 8, Canada 6, Germany 6, Australia 5, Switzerland 3, Denmark 2, Italy 2, New Zealand 2, Norway 2, The Netherlands 2, Austria 1, Chile 1, Finland 1, Hong Kong 1, Israel 1, Kuwait 1, Singapore 1 |
|                                                         | <i>Medium HDI</i>                                      | 8   | China 2, Russia 2, Thailand 2, Philippines 1, Turkey 1                                                                                                                                                                                      |
|                                                         | <i>Low HDI</i>                                         | 0   | -                                                                                                                                                                                                                                           |
|                                                         | <i>not classified</i>                                  | 1   | Taiwan 1                                                                                                                                                                                                                                    |
